# Supplementary material for: Size-selective concentration and label-free characterization of protein aggregates using a Raman active nanofluidic device
Source: Royal Society of Chemistry journal article supplement (doi:10.1039/c0lc00383b), 2010-12-01
Supplement: electronic_supplementary_information_loc.pdf [file electronic_supplementary_information_loc.pdf]

## **Electronic Supplementary Information for Lab on a chip**

### **Size-selective concentration and label-free characterization of protein aggregates using a Raman active nanofluidic device**

Inhee Choi, Yun Suk Huh, and David Erickson\*

Sibley School of Mechanical and Aerospace Engineering, Cornell University, Ithaca, NY, 14853, USA.

\*To whom correspondence should be addressed, E-mail: [de54@cornell.edu](mailto:de54@cornell.edu).

Prof. David Erickson

Sibley School of Mechanical and Aerospace Engineering, Cornell University,

240 Upson Hall, Ithaca, NY, 14853

Phone: (607) 255-4861; Fax: (607) 255-1222

**Supplementary Fig. S1. Demonstration of size-selective concentration of PS beads with different diameters.** (a) and (b), 1  $\mu\text{m}$  and 490 nm PS beads, were accumulated at the micro/nanofluidic junction. (c) and (d), 210 nm and 51 nm PS beads, passed through the nanochannel as expected.

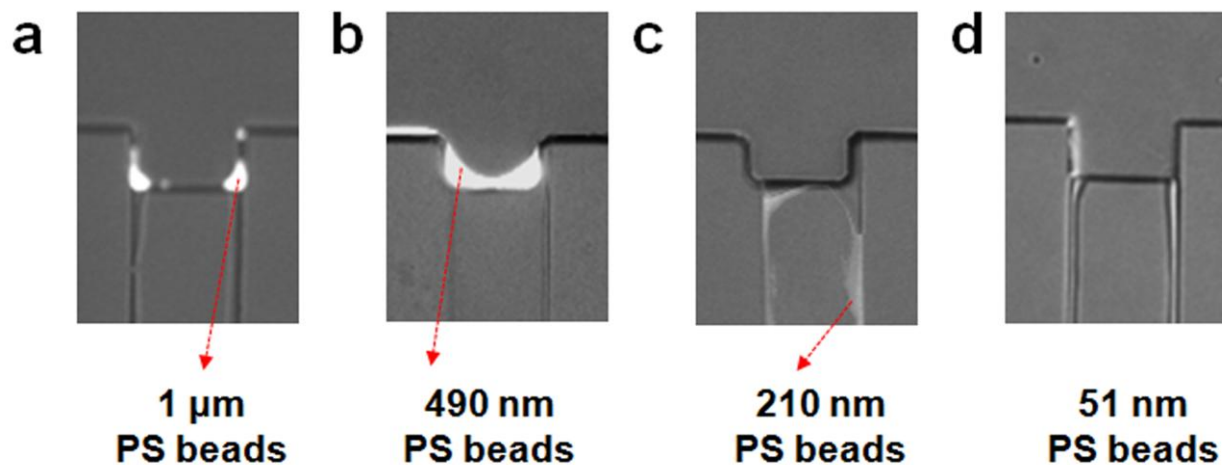

**Supplementary Fig. S2. Comparison of fluorescence signals obtained from nanofluidic device with traditional fluorescence analysis.** To identify the existence of protein aggregates, each protein solution was mixed with a 30  $\mu$ M ThT solution with volume ratio of 1:10, and then it was characterized as below. Proteins were incubated for 47 days. (a) With the nanofluidic device: each sample solution with volume of 10  $\mu$ l was injected into a nanofluidic device and then the concentrated protein aggregates were observed by imaging with fluorescence microscopy. (b) Traditional analysis: each sample solution with volume of 200  $\mu$ l was added into a well in a 96-microwell plate, and then fluorescence intensities were measured by fluorescence spectroscopy. The yellow band of a graph indicates the range of intensities measured for the concentrations examined with our device. As can be seen for the traditional fluorescence method, it is hard to obtain reliable fluorescent intensities below the  $\mu$ M level.

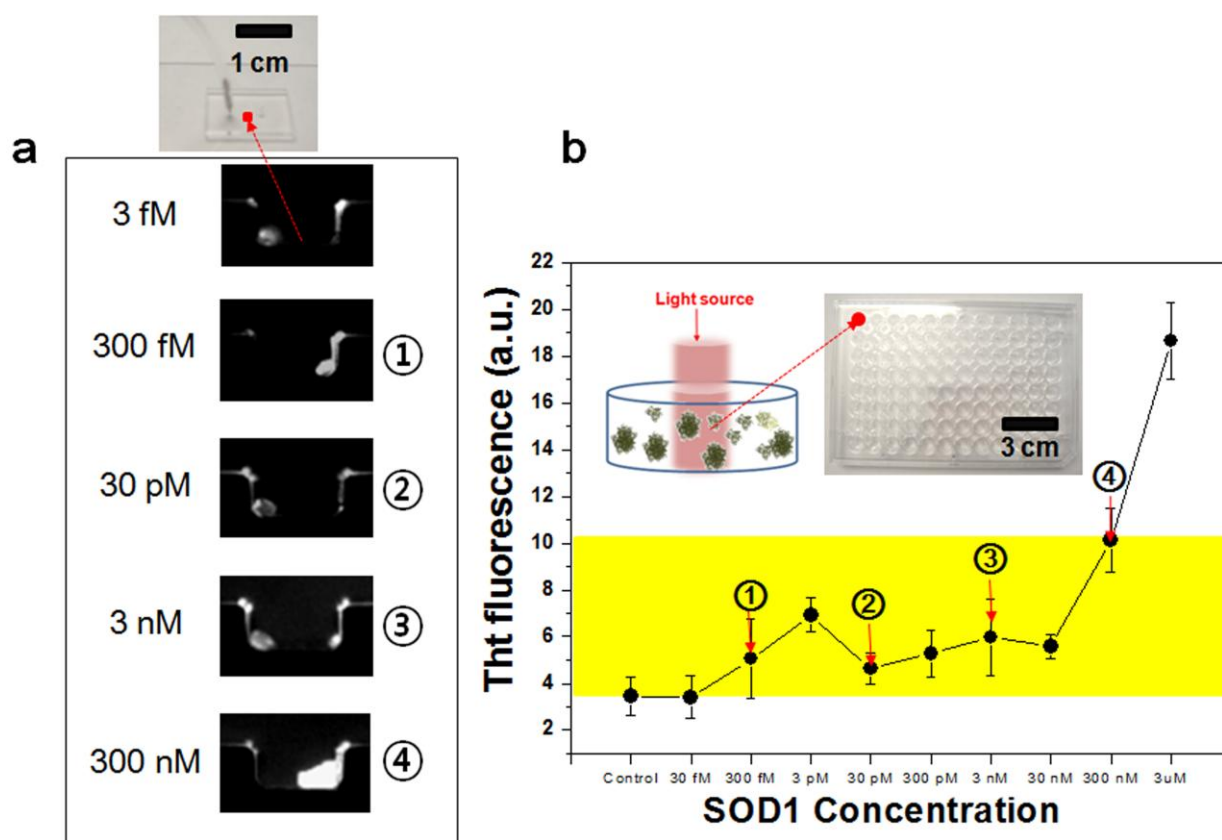

# Supplementary Fig. S3: Characterization of changes in structural and surface properties by SOD1

**aggregation.** The conformational changes in proteins are generally accompanied by structural turnover and/or changes in surface residues. Characterization experiments were performed here using a 10 mg/ml (310  $\mu$ M) SOD1, before and after the aggregation. (a) A change in secondary structures was measured by circular dichroism (CD) spectroscopy. The characteristic peak for secondary structures of SOD1 is shown to disappear following aggregation. (b) A change in surface hydrophobicity was measured by 8-anilino-1-naphthalene-sulfonic acid (ANS) fluorescence spectroscopy<sup>1,2</sup>. The enhancement of ANS fluorescence intensity reveals the increase of protein surface hydrophobicity by aggregation. Red arrows indicate the changes in protein properties induced by aggregation process.

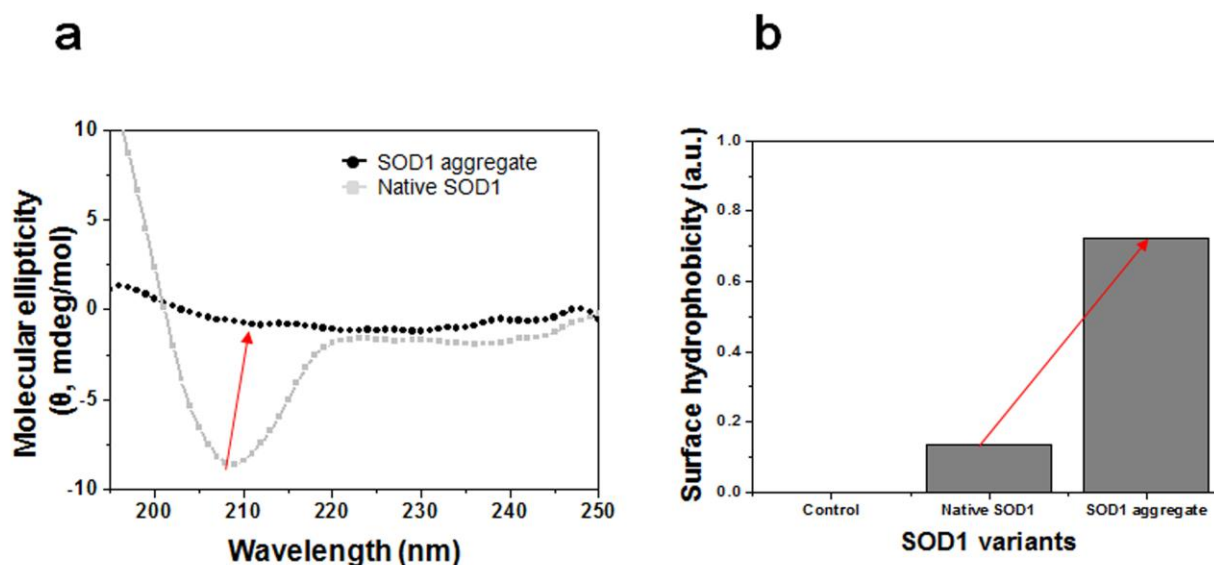

**Application of nanofluidic concentration device to amyloid beta (A $\beta$ ) protein aggregates.** (a) A representative AFM image of A $\beta$  fibrils. (b) Images showing the A $\beta$  fibrils concentrated at a micro/nanofluidic junction. Samples were prepared with initial concentration of 1  $\mu$ M, for different incubation times (2 month, 1 week, 2 day, and 0 day). (c) Comparison of fluorescence signals a obtained from the nanofluidic device with a traditional fluorescence analysis for different initial concentrations of A $\beta$  (from 10 fM to 1  $\mu$ M) incubated for 47 days. The yellow band in the graph indicates the range of intensities measured for the concentrations that were examined with our device. As can be seen for the traditional fluorescence method, it is hard to obtain reliable fluorescent intensities below the  $\mu$ M level.

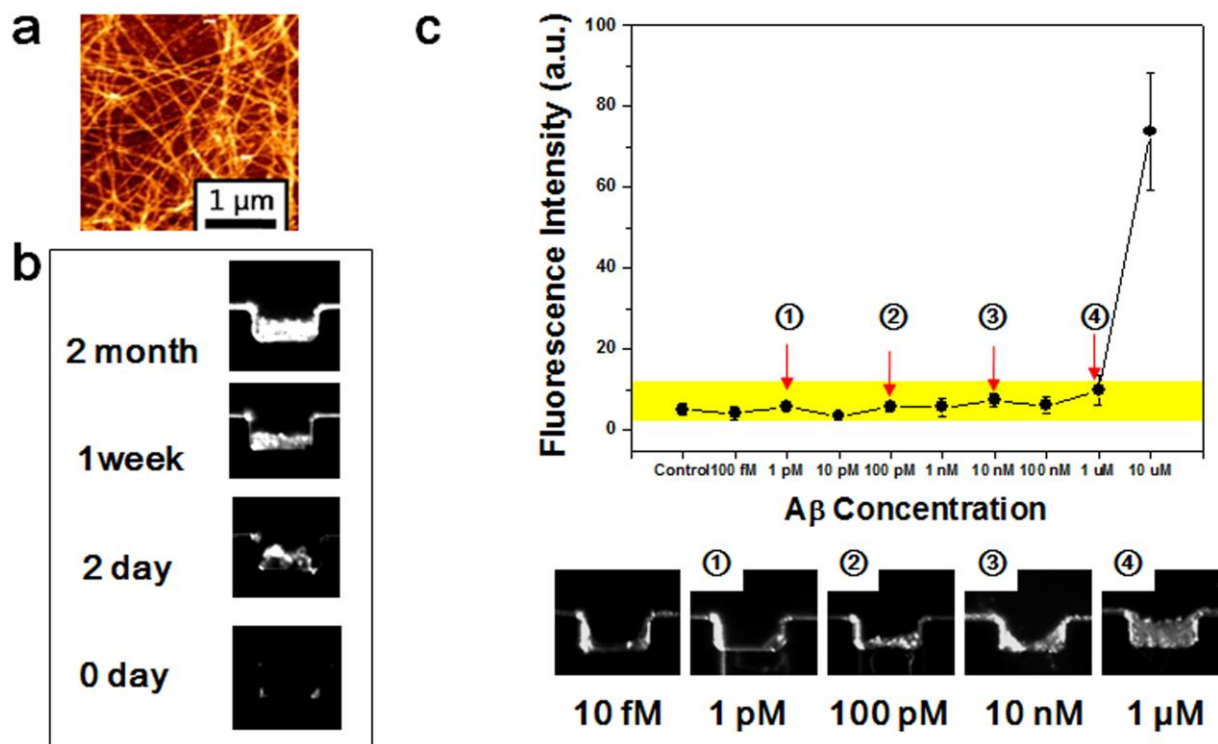

**Supplementary Table S1. Assignment of Bands in SERS Spectra of SOD1 aggregates<sup>3-7</sup>**

| Wavenumber (cm <sup>-1</sup> ) | Assignment                                         | Comment                         |
|--------------------------------|----------------------------------------------------|---------------------------------|
| 823                            | Tyrosine doublet                                   | Hydrophobic, aromatic residue   |
| 850                            | Tyrosine                                           | Hydrophobic, aromatic residue   |
| 961                            | n(C-C)                                             | Hydrophobicity                  |
| 1000                           | Phenylalanine                                      | Hydrophobic, aromatic residue   |
| 1030                           | Phenylalanine                                      | Hydrophobic, aromatic residue   |
| 1087                           | Lysine, Arginine,<br>Glutamine, Asparagine         | Charged (positive)              |
| 1124                           | Valine and Isoleucine                              | Hydrophobic                     |
| 1185                           | Phenylalanine and Tyrosine                         | Hydrophobic, aromatic residue   |
| 1208                           | Phenylalanine and Tyrosine                         | Hydrophobic, aromatic residue   |
| 1241                           | amide III (β-sheet)                                | β-sheet structure               |
| 1260                           | amide III (α-helix)                                | α-helix structure               |
| 1323                           | amide III and CH <sub>2</sub> twist/wag            | amide III                       |
| 1402                           | aspartic acid, glutamic acid, ν(COO <sup>-</sup> ) | Metallation, charged (negative) |
| 1488                           | Histidine                                          | Charged (positive)              |
| 1547                           | Phenylalanine                                      | Hydrophobic, aromatic residue   |
| 1589                           | Phenylalanine                                      | Hydrophobic, aromatic residue   |

## For Supplementary Fig. 3

**a, CD spectroscopy-** The secondary structure of proteins was determined by CD analysis (Jasco J-715 spectropolarimeter equipped with a Naslab temperature controller). A 0.1-cm quartz cell was used for the measurements and the CD spectra which was recorded from 190 to 250 nm. All CD measurements were carried out using the following parameters: 1 nm bandwidth, 50 nm/min run speed, 1 nm step size, 8.3 s response time, and an average of three runs.

**b, ANS fluorescence spectroscopy<sup>1,2</sup>**- For the measurement of surface hydrophobicity, the fluorescence property of the extrinsic fluorophore ANS (final concentration 20  $\mu$ M, excitation at 360 nm, emission at 450 nm) was examined by 10 min of incubation with proteins in the PBS buffer via fluorescence spectroscopy.

## Supplementary references

- 1 Jiang, W., Han, Y. C., Zhou, R. Y., Zhang, L. N. & Liu, C. L. DNA is a template for accelerating the aggregation of copper, zinc superoxide dismutase. *Biochemistry* **46**, 5911-5923 (2007).
- 2 Rakhit, R. *et al.* Monomeric Cu,Zn-superoxide dismutase is a common misfolding intermediate in the oxidation models of sporadic and familial amyotrophic lateral sclerosis. *J. Biol. Chem.* **279**, 15499-15504 (2004).
- 3 Ortiz, C., Zhang, D. M., Xie, Y., Davisson, V. J. & Ben-Amotz, D. Identification of insulin variants using Raman spectroscopy. *Anal. Biochem.* **332**, 245-252 (2004).
- 4 Maiti, N. C., Apetri, M. M., Zagorski, M. G., Carey, P. R. & Anderson, V. E. Raman spectroscopic characterization of secondary structure in natively unfolded proteins: alpha-synuclein. *J. Am. Chem. Soc.* **126**, 2399-2408 (2004).
- 5 Dong, J. *et al.* Metal binding and oxidation of amyloid-beta within isolated senile plaque cores: Raman microscopic evidence. *Biochemistry* **42**, 2768-2773 (2003).
- 6 Lepock, J. R., Arnold, L. D., Torrie, B. H., Andrews, B. & Kruuv, J. Structural-Analyses of Various Cu-2+-Superoxide, Zn-2+-Superoxide Dismutases by Differential Scanning Calorimetry and Raman-Spectroscopy. *Arch. Biochem. Biophys.* **241**, 243-251 (1985).
- 7 Hashimoto, S., Ono, K. & Takeuchi, H. UV resonance Raman scattering from metal-coordinating histidine residues in Cu,Zn-superoxide dismutase. *J. Raman Spectrosc.* **29**, 969-975 (1998).
